# Supplementary material for: Impact of Integration of Severe Acute Malnutrition Treatment in Primary Health Care Provided by Community Health Workers in Rural Niger
Source: MDPI journal article supplement (doi:10.3390/nu13114067), 2021-11-14
Supplement: s1 [file s1]

**Figure S1. Sanitary map Mayahi district.**

Niger map. Maradi Region. District Mayahi

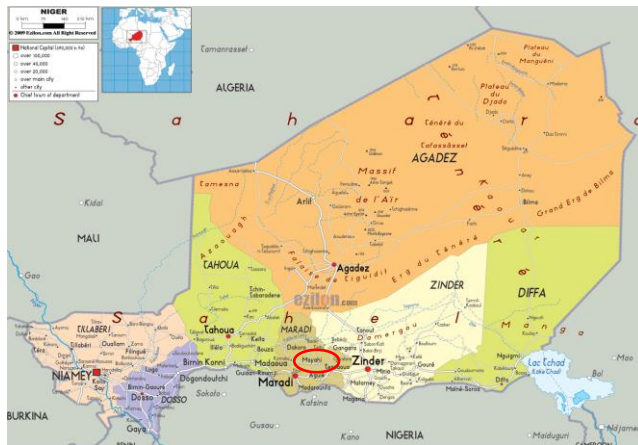

Sanitary map Mayahi district.

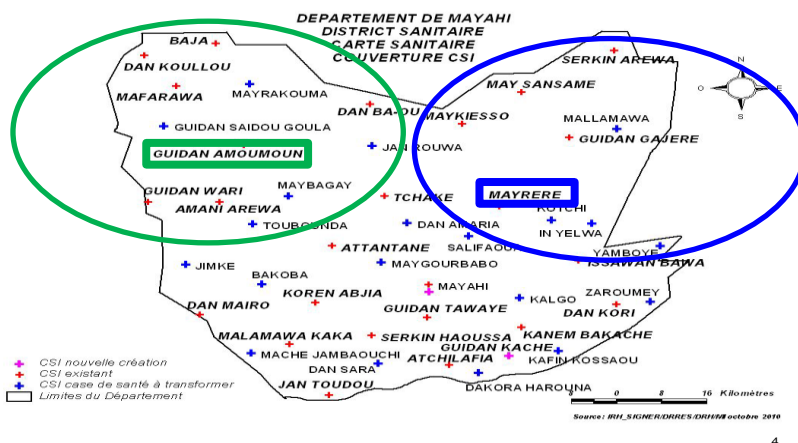

**Control zone, Mayrere :** Total population 64,183 hab. Children under five 12,836

4 Health facilities: Meireyey, Guidan gagere, Serkin arewa, Messanssame

**Intervention zone, Guidan Amoumoun :** Total population 88,199 hab. Children under five 17,639

6 Health facilities: Guidan amoumoune, Guidan wari, Baja, Mafarawa, Dan koullou, Dan mallan merakouma

10 Community Health Workers: Guidan barmo, Na aya, Koudou Baraou, Guidan losso, Dadin tamro, Jibbi saboua, Kouka dan bako, Dan ladi bakane, Melawa, Malloumey
